# Supplementary material for: Natural and Modified Oligonucleotide Sequences Show Distinct Strand Displacement Kinetics and These Are Affected Further by Molecular Crowders
Source: MDPI journal article supplement (doi:10.3390/biom12091249), 2022-09-06
Supplement: s1 [file s1]

## **Supporting Information**

### **Natural and Modified Oligonucleotide Sequences Show Distinct Strand Displacement Kinetics and These Are Affected Further by Molecular Crowders**

Ivana Domljanovic<sup>1</sup>, Alessandro Ianaro<sup>2</sup>, Curzio Rüegg<sup>1</sup>, Michael Mayer<sup>2</sup> and Maria Taskova<sup>2\*</sup>

#### **Contents**

1. Kinetic plots of Cy5 fluorescence emission in PBS and PBS containing crowders
2. Kinetic plots of Cy5 fluorescence emission in higher salt concentration PBS buffer and PBS containing crowders
3. Strand exchange rate constants in higher salt concentration PBS buffers
4. Viscosity normalized strand exchange rate constants in PBS buffers
5. Fit results
6. Fit results in higher salt

## 1. Kinetic plots of Cy5 fluorescence emission in PBS and PBS containing crowders

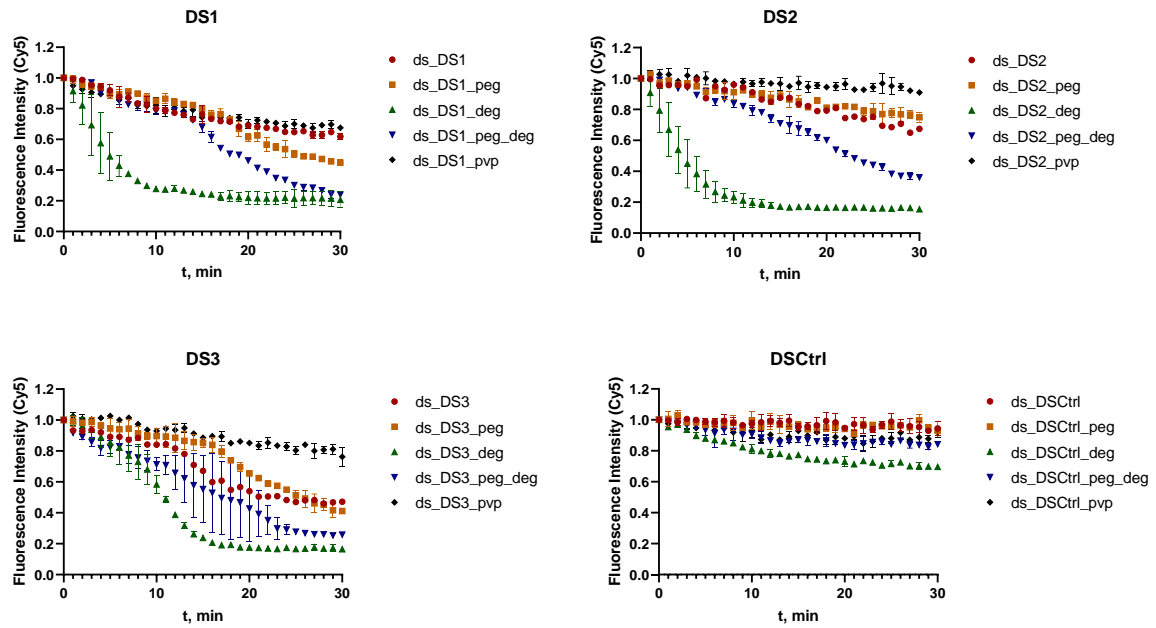

Figure S1. Fluorescence intensity Cy5 kinetic curves for duplex (Bmut-CoBmut) displaced with DS1, DS2, DS3, and DSCtrl in pure PBS buffer and buffers complexed with polyethylene glycol (peg), diethylene glycol dimethyl ether (deg), mixed peg-deg and polyvinylpyrrolidone (pvp) over time of minimum of 30 min at a temperature of 37 °C, as indicated. The displacement strands DS1, DS2, DS3, and DSCtrl are represented in Table 1. Error bars indicate  $\pm$  SD (n = 2)

## 2. Kinetic plots of Cy5 fluorescence emission in higher salt concentration PBS buffers

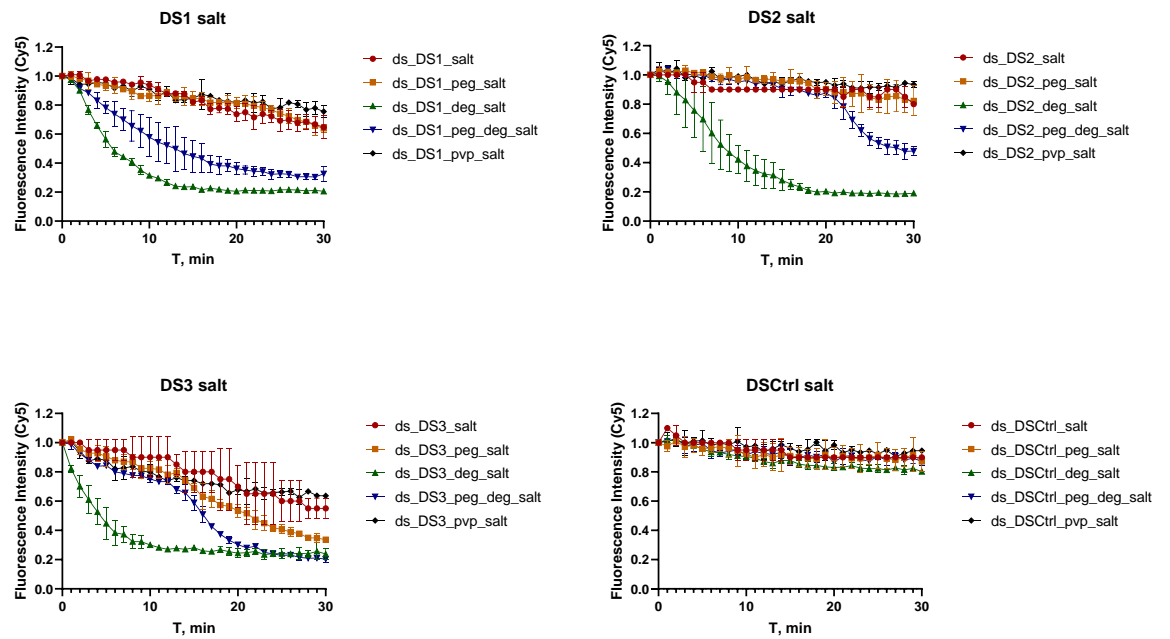

Figure S2. Fluorescence intensity Cy5 kinetic plots for duplex-ds (Bmut-CoBmut) with DS1, DS2, DS3, DSCtrl in all buffers (peg, deg, peg\_deg, pvp) with higher salt concentration (additional 150 mM NaCl) as indicated. Error bars indicate  $\pm$  SD (n = 2).

### 3. Strand exchange rate constants in higher salt concentration PBS buffers

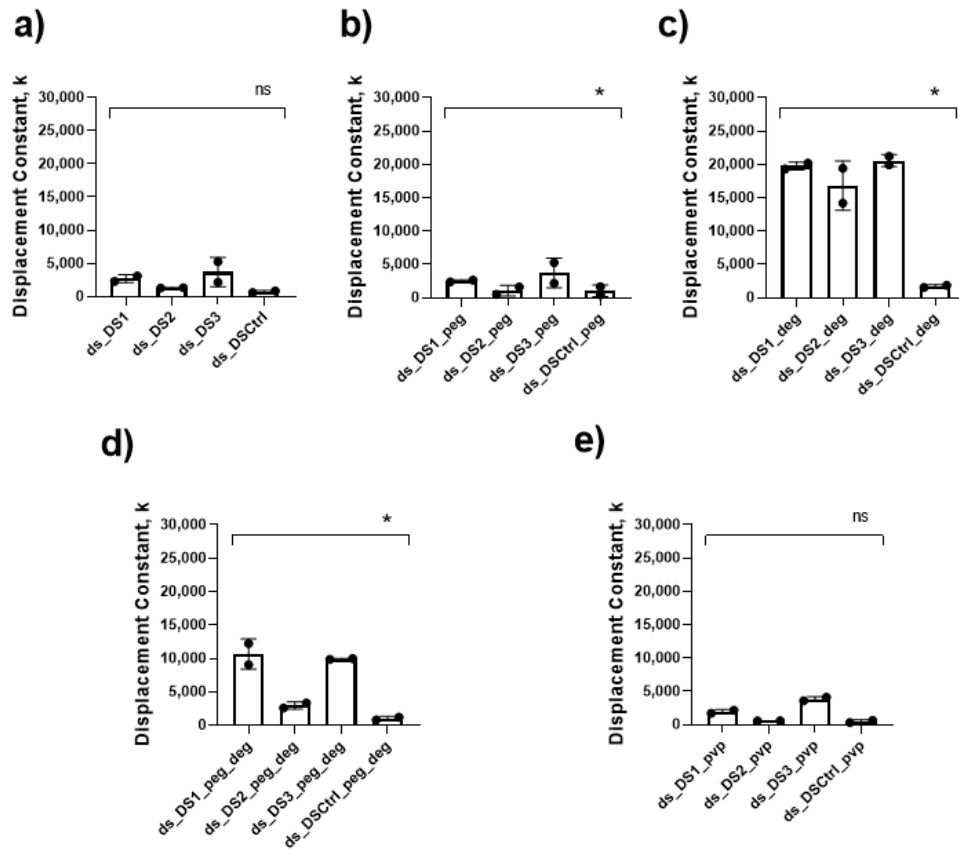

Figure S3. Displacement constant  $k$ , (L·min<sup>-1</sup>·mol<sup>-1</sup>) for duplex (Bmut-CoBmut) displaced with DS1, DS2, DS3, and DSCTRL in (a) PBS buffer with higher salt concentration ( addition of 150 mM NaCl) or PBS buffers with higher salt concentration enriched with (b) polyethylene glycol (peg), (c) diethylene glycol dimethyl ether (deg), (d) mixed peg-deg and (e) polyvinylpyrrolidone (pvp) as indicated. The displacement strands DS1, DS2, DS3 and DSCTRL are represented in Table 1. Error bars indicate  $\pm$  SD (n = 2). P values were calculated using one-way ANOVA. Abbreviations: “\*” indicates 95% confidence; “ns” indicates statistically not significant.

#### 4. Viscosity normalized strand exchange rate constants in PBS buffers

**Table S1.** Measured viscosity [Pa\*s] of the various PBS buffers

|                  | <b>pbs</b> | <b>peg</b> | <b>deg</b> | <b>peg_deg</b> | <b>pvp</b> |
|------------------|------------|------------|------------|----------------|------------|
| Unit             | [Pa*s]     |            |            |                |            |
| Measurement<br>s | 0.000806   | 0.005668   | 0.000932   | 0.004836       | 0.004251   |
|                  | 0.000839   | 0.005635   | 0.000999   | 0.004710       | 0.004113   |
|                  | 0.000693   | 0.005698   | 0.000911   | 0.004782       | 0.004264   |
|                  | 0.000660   | 0.005704   | 0.000901   | 0.004782       | 0.004242   |
|                  | 0.000678   | 0.005658   | 0.000882   | 0.004832       | 0.004328   |
|                  | 0.001032   | 0.005833   | 0.001307   | 0.005242       | 0.004751   |
|                  | 0.000809   | 0.005753   | 0.001109   | 0.004835       | 0.004386   |
|                  | 0.000855   | 0.005908   | 0.001008   | 0.004978       | 0.004387   |
|                  | 0.000630   | 0.005213   | 0.001011   | 0.004930       | 0.004414   |
|                  | 0.000779   | 0.006015   | 0.00105    | 0.004696       | 0.005117   |
| Average          | 0.000778   | 0.005709   | 0.001011   | 0.004862       | 0.004425   |

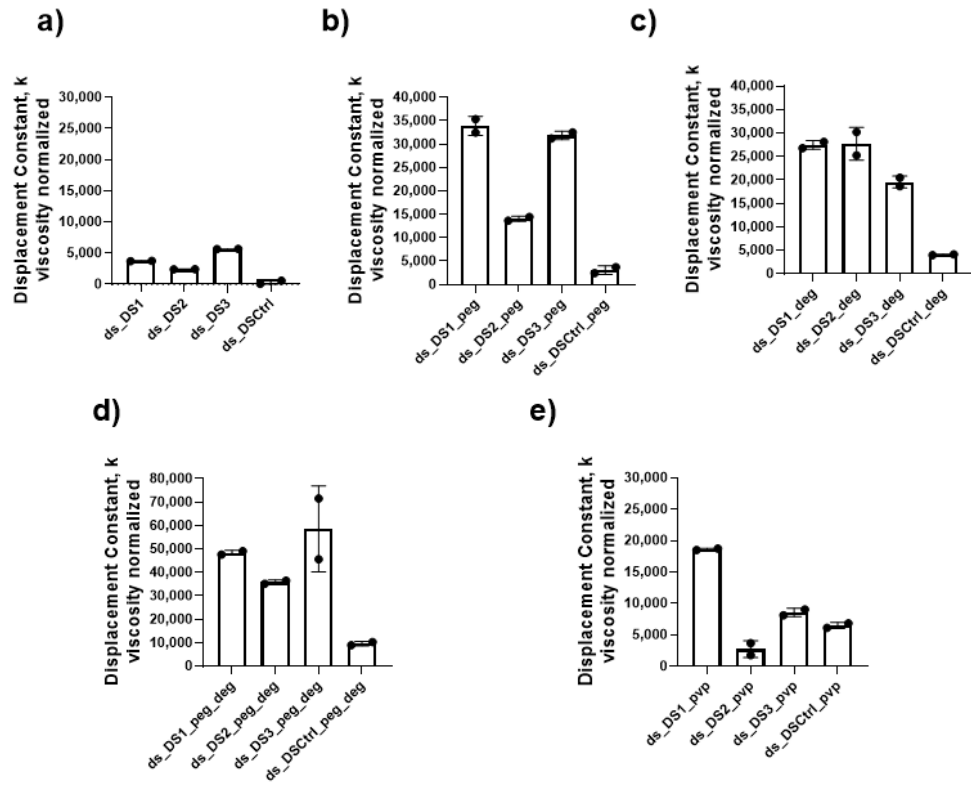

Figure S4. Normalized displacement constant  $k$ , ( $L \cdot \text{min}^{-1} \cdot \text{mol}^{-1}$ ) with the measured viscosity (Table S1) for duplex (Bmut-CoBmut) displaced with DS1, DS2, DS3, and DSCtrl in (a) PBS buffer or PBS buffers enriched with (b) polyethylene glycol (peg), (c) diethylene glycol dimethyl ether (deg), (d) mixed peg-deg and (e) polyvinylpyrrolidone (pvp) as indicated. The displacement strands DS1, DS2, DS3 and DSCtrl are represented in Table 1. Error bars indicate  $\pm$  SD ( $n = 2$ ).

## 5. Fit results

### Pure PBS buffer

ds\_DSctrl

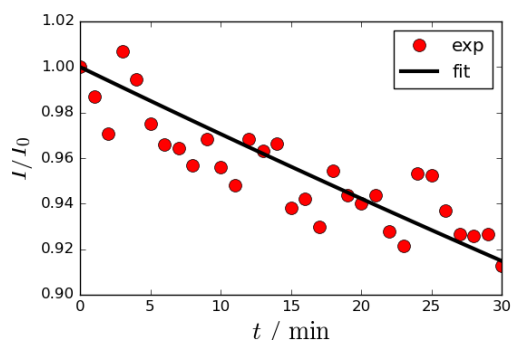

|     |                |
|-----|----------------|
| 598 | +/- 29 (4.9%)  |
| 95  | +/- 46 (49.2%) |

ds\_DS1

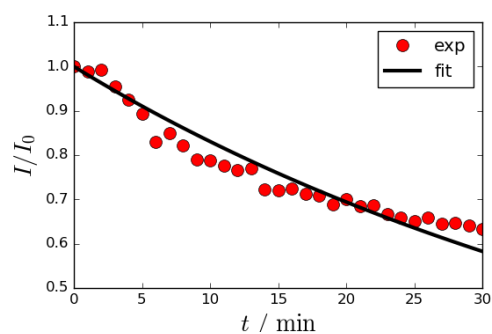

|      |                |
|------|----------------|
| 3773 | +/- 105 (2.8%) |
| 3715 | +/- 75 (2.0%)  |

ds\_DS2

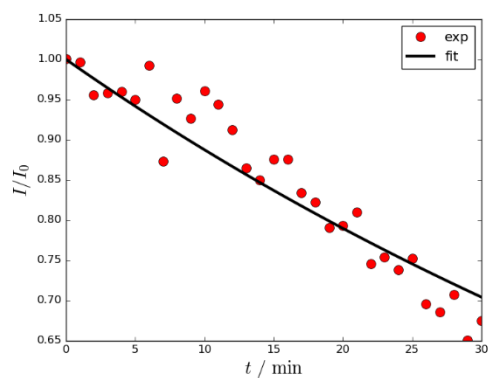

|      |               |
|------|---------------|
| 2429 | +/- 96 (4.0%) |
| 2412 | +/- 97 (4.0%) |

ds\_DS3

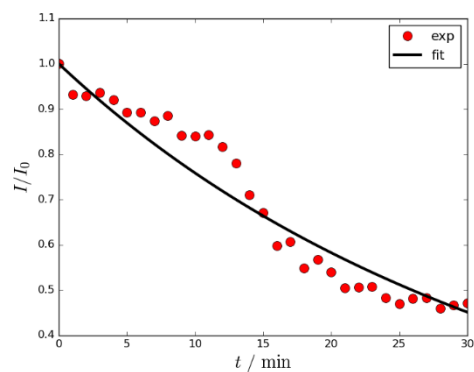

|      |                |
|------|----------------|
| 5660 | +/- 202 (3.6%) |
| 5679 | +/- 202 (3.5%) |

## Peg buffer

ds\_DSctrl\_peg

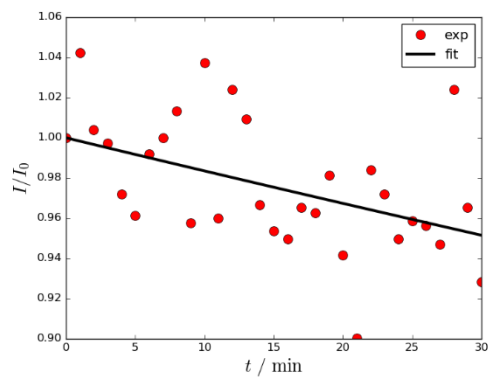

|     |                |
|-----|----------------|
| 508 | +/- 56 (11.1%) |
| 332 | +/- 60 (18.2%) |

ds\_DS1\_peg

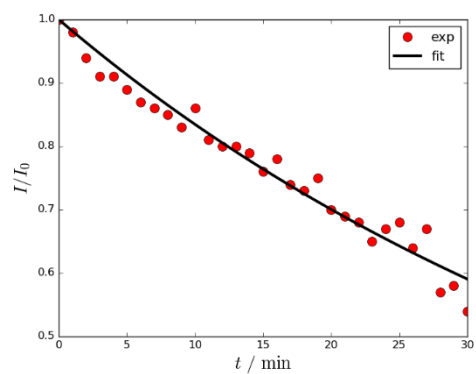

|            |                |
|------------|----------------|
| 4818.501   | +/- 213 (4.4%) |
| 4424.28536 | +/- 224 (5.1%) |

ds\_DS2\_peg

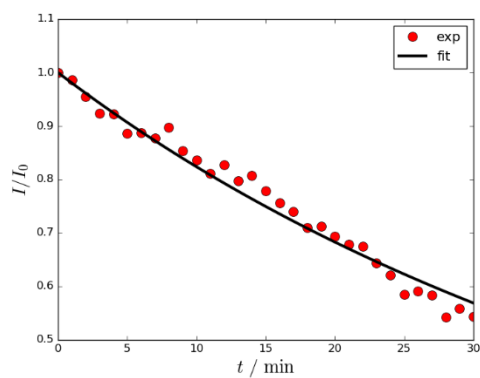

|      |               |
|------|---------------|
| 1860 | +/- 66 (3.6%) |
| 1969 | +/- 70 (3.6%) |

ds\_DS3\_peg

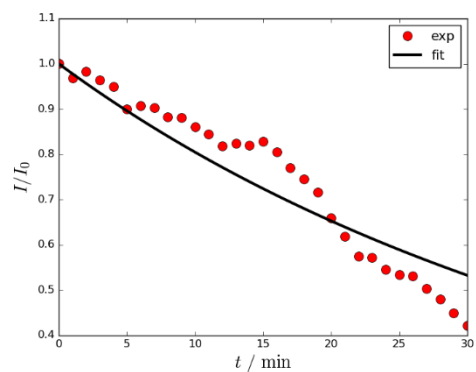

|      |                 |
|------|-----------------|
| 4430 | +/- 211 (4.8%)  |
| 4254 | +/- 380. (8.9%) |



## Deg buffer

ds\_DSCTRL\_deg

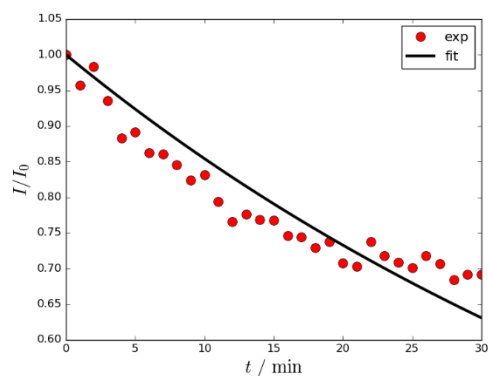

|      |                |
|------|----------------|
| 3066 | +/- 114 (3.7%) |
| 3198 | +/- 110 (3.5%) |

ds\_DS1\_deg

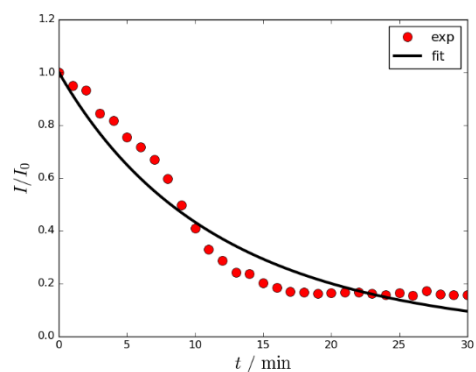

|       |                 |
|-------|-----------------|
| 20616 | +/- 1029 (5.0%) |
| 21628 | +/- 1857 (8.6%) |

ds\_DS2\_deg

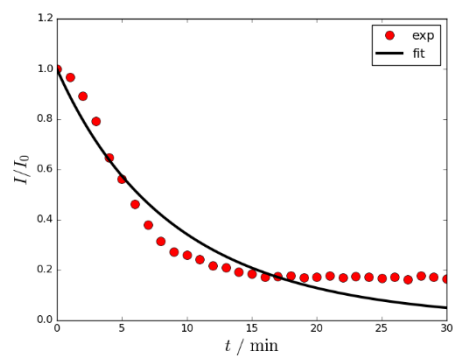

|       |                 |
|-------|-----------------|
| 19427 | +/- 1210 (6.2%) |
| 23241 | +/- 1191 (5.1%) |

ds\_DS3\_deg

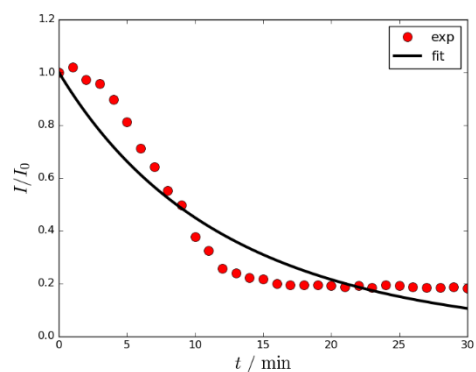

|       |                 |
|-------|-----------------|
| 15764 | +/- 720 (4.6%)  |
| 14385 | +/- 1138 (7.9%) |

## Peg\_deg buffer

ds\_DSctrl\_peg\_deg

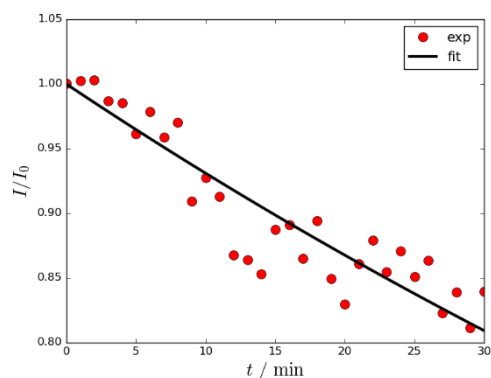

|      |                |
|------|----------------|
| 1439 | +/- 58 (4.1%)  |
| 1644 | +/- 103 (6.3%) |

ds\_DS1\_peg\_deg

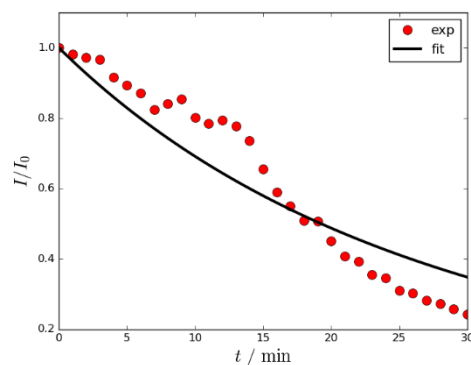

|            |                |
|------------|----------------|
| 7622.631   | +/- 434 (5.7%) |
| 7857.06592 | +/- 430 (5.5%) |

ds\_DS2\_peg\_deg

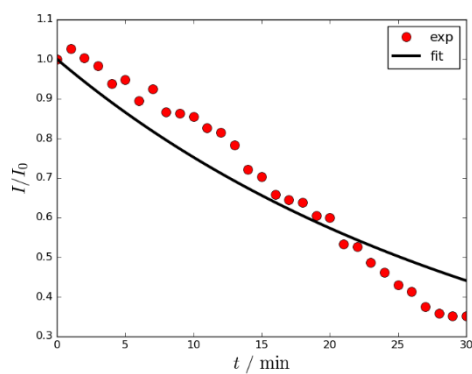

|      |                |
|------|----------------|
| 5837 | +/- 290 (5.0%) |
| 5620 | +/- 260 (4.6%) |

ds\_DS3\_peg\_deg

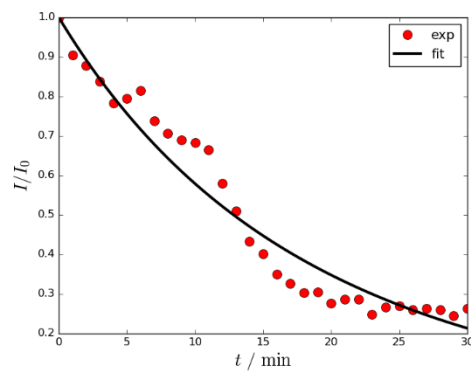

|       |                |
|-------|----------------|
| 11447 | +/- 391 (3.4%) |
| 7304  | +/- 438 (6.0%) |

## Pvp buffer

ds\_DSctrl\_pvp

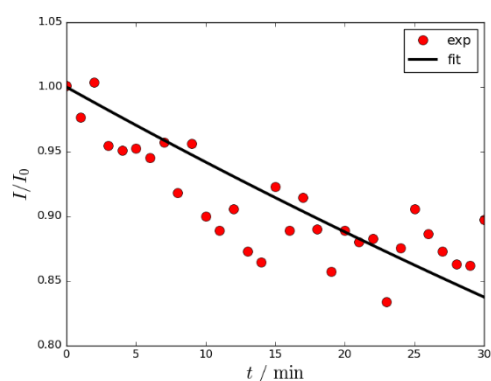

|      |                |
|------|----------------|
| 1076 | +/- 102 (9.5%) |
| 1202 | +/- 70 (5.8%)  |

ds\_DS1\_pvp

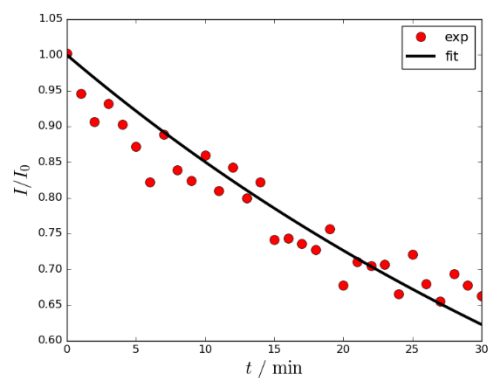

|      |                |
|------|----------------|
| 3292 | +/- 110 (3.3%) |
| 3252 | +/- 133 (4.1%) |

ds\_DS2\_pvp

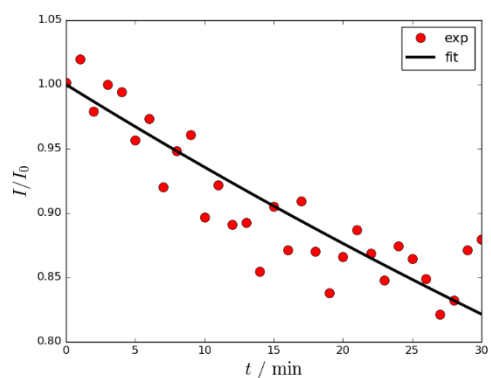

|     |                |
|-----|----------------|
| 643 | +/- 19 (3.0%)  |
| 311 | +/- 65 (20.9%) |

ds\_DS3\_pvp

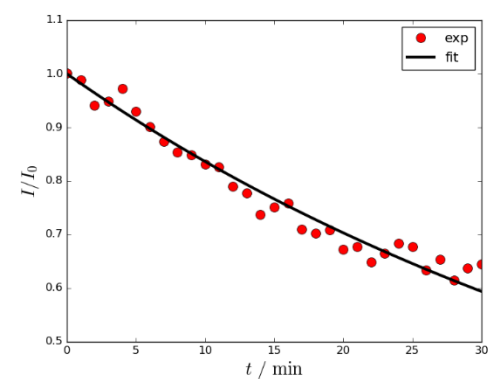

|      |               |
|------|---------------|
| 1590 | +/- 89 (5.7%) |
| 1425 | +/- 69 (4.9%) |

## 6. Fit results in higher salt

### Pure PBS\_higher salt

ds\_DSCTRL\_salt

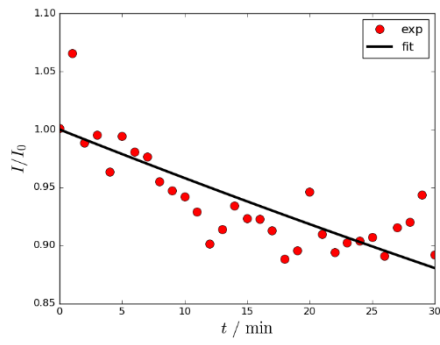

|      |                |
|------|----------------|
| 622  | +/- 68 (10.9%) |
| 8571 | +/- 59 (6.9%)  |

ds\_DS1\_salt

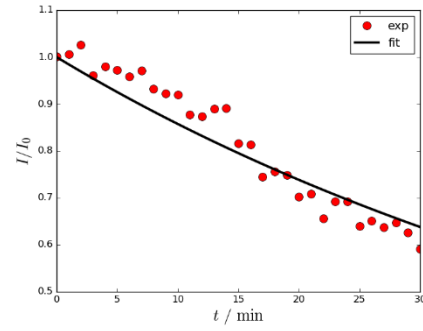

|      |                |
|------|----------------|
| 2283 | +/- 79 (3.4%)  |
| 3117 | +/- 127 (4.1%) |

ds\_DS2\_salt

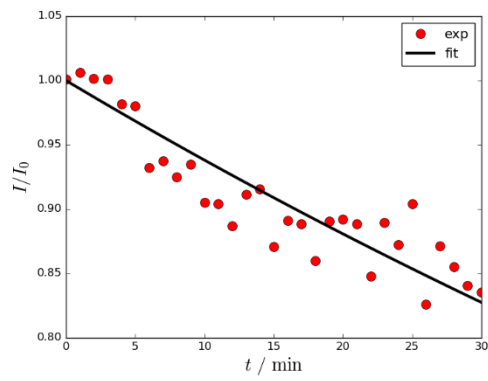

|      |                       |
|------|-----------------------|
| 1285 | +/- 54.6686840 (4.2%) |
| 1329 | +/- 61.9681403 (4.7%) |

ds\_DS3\_salt

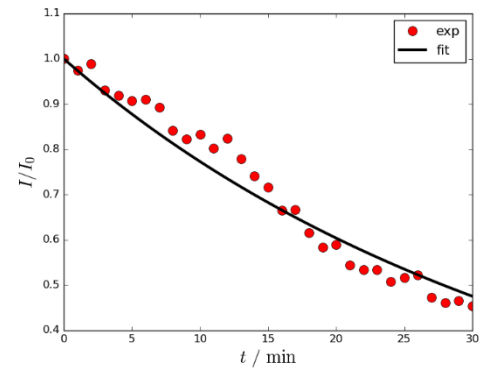

|      |                |
|------|----------------|
| 5271 | +/- 148 (2.8%) |
| 2157 | +/- 174 (8.1%) |

## Peg buffer\_higher salt

ds\_DSctrl\_peg\_salt

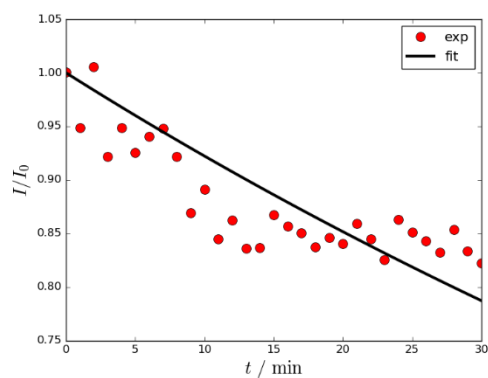

|      |                |
|------|----------------|
| 1629 | +/- 91 (5.6%)  |
| 423  | +/- 47 (11.1%) |

ds\_DS1\_peg\_salt

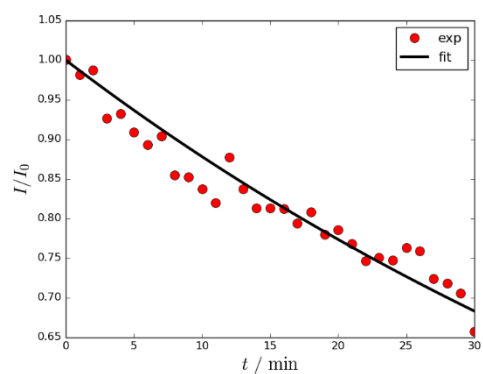

|      |                |
|------|----------------|
| 2628 | +/- 69 (2.6%)  |
| 2352 | +/- 129 (5.5%) |

ds\_DS2\_peg\_salt

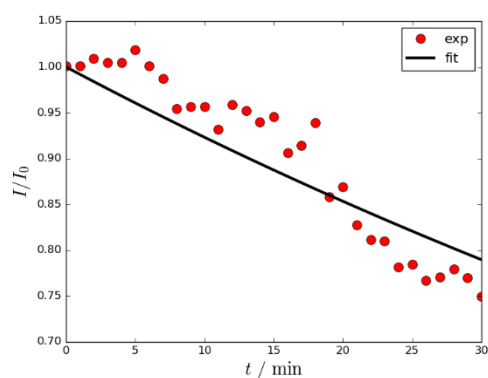

|      |                |
|------|----------------|
| 1609 | +/- 95 (5.9%)  |
| 495  | +/- 73 (14.7%) |

ds\_DS3\_peg\_salt

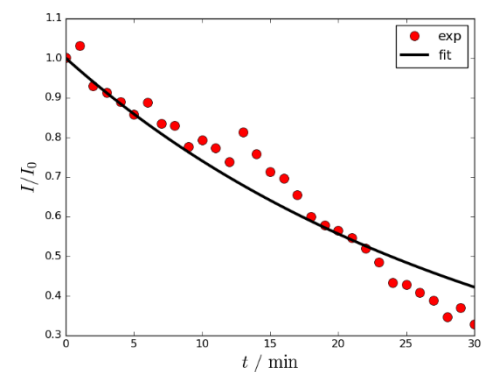

|      |                |
|------|----------------|
| 6165 | +/- 242 (3.9%) |
| 6558 | +/- 368 (5.6%) |

## Deg buffer\_higher salt

ds\_DSctrl\_deg\_salt

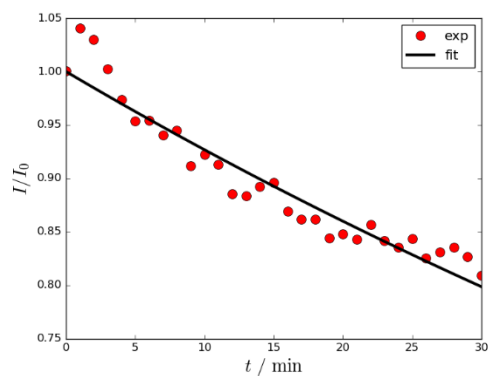

|      |               |
|------|---------------|
| 1868 | +/- 65 (3.5%) |
| 1529 | +/- 46 (3.0%) |

ds\_DS1\_deg\_salt

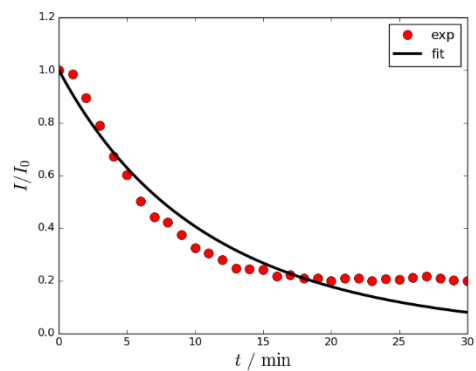

|       |                 |
|-------|-----------------|
| 20183 | +/- 1101 (5.5%) |
| 19318 | +/- 874 (4.5%)  |

ds\_DS2\_deg\_salt

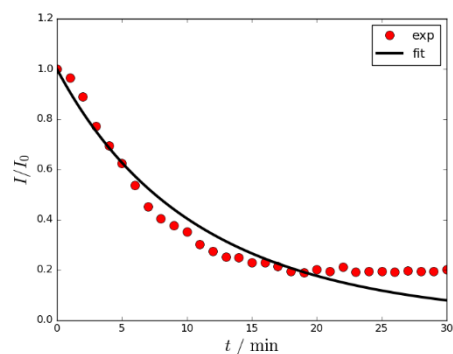

|       |                |
|-------|----------------|
| 14200 | +/- 776 (5.5%) |
| 19409 | +/- 785 (4.0%) |

ds\_DS3\_deg\_salt

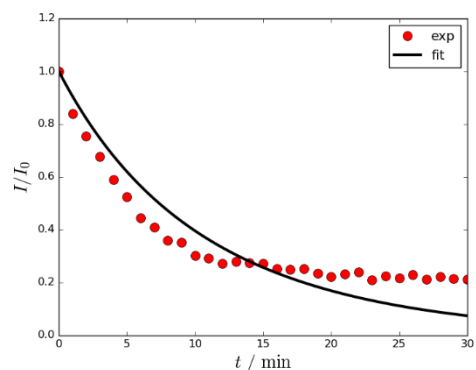

|       |                 |
|-------|-----------------|
| 21203 | +/- 2064 (9.7%) |
| 19932 | +/- 1151 (5.8%) |

## Peg\_deg buffer\_higher salt

ds\_DSctrl\_peg\_deg\_salt

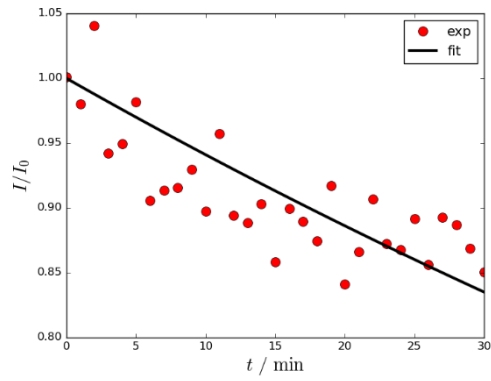

|      |               |
|------|---------------|
| 1222 | +/- 77 (6.3%) |
| 808  | +/- 51 (6.3%) |

ds\_DS1\_peg\_deg\_salt

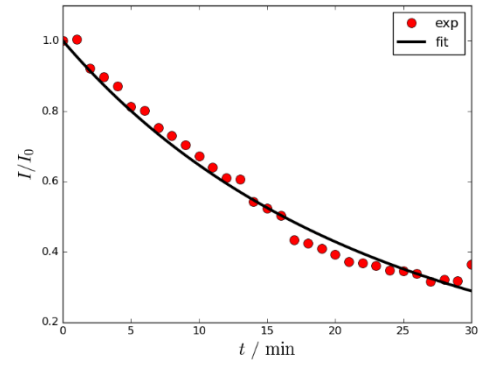

|       |                |
|-------|----------------|
| 9057  | +/- 166 (1.8%) |
| 12243 | +/- 388 (3.2%) |

ds\_DS2\_peg\_deg\_salt

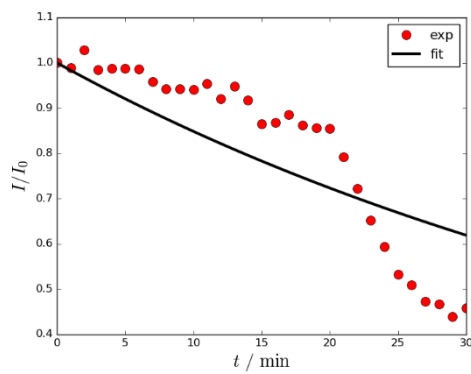

|      |                 |
|------|-----------------|
| 2581 | +/- 318 (12.3%) |
| 3335 | +/- 341 (10.2%) |

ds\_DS3\_peg\_deg\_salt

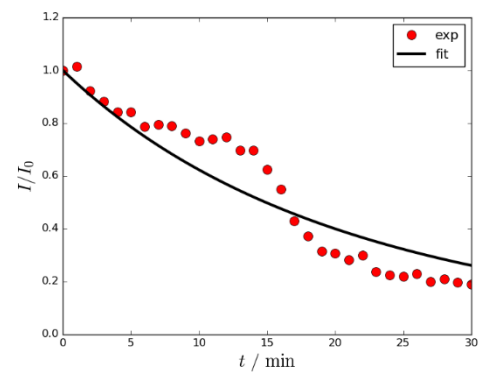

|      |                |
|------|----------------|
| 9976 | +/- 504 (5.0%) |
| 9855 | +/- 592 (6.0%) |

## Pvp buffer\_higher salt

ds\_DSctrl\_pvp\_salt

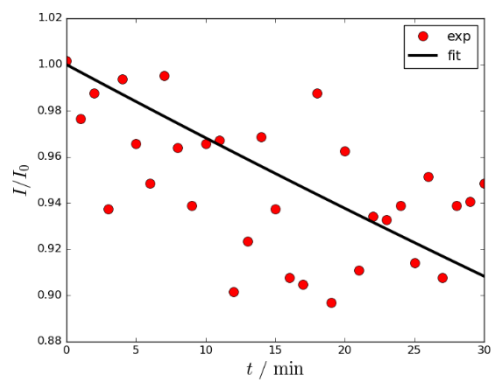

|     |                |
|-----|----------------|
| 647 | +/- 64 (9.9%)  |
| 324 | +/- 76 (23.5%) |

ds\_DS1\_pvp\_salt

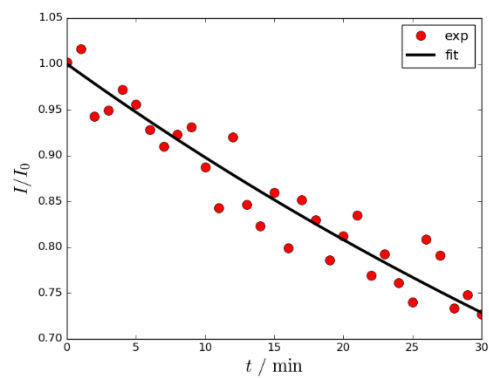

|      |               |
|------|---------------|
| 1712 | +/- 86 (5.0%) |
| 2172 | +/- 69 (3.2%) |

ds\_DS2\_pvp\_salt

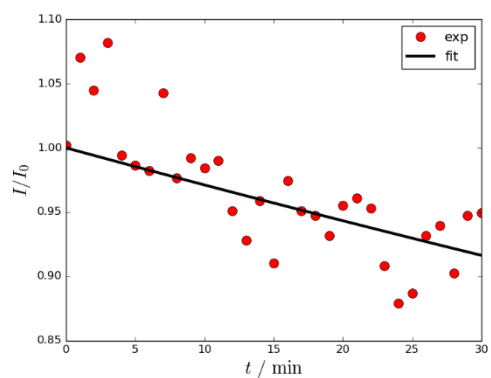

|     |                |
|-----|----------------|
| 587 | +/- 75 (12.8%) |
| 564 | +/- 46 (8.2%)  |

ds\_DS3\_pvp\_salt

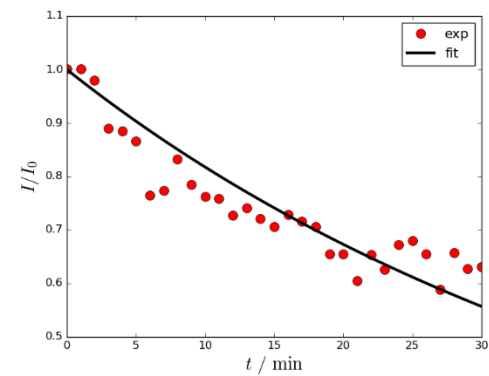

|      |                |
|------|----------------|
| 3591 | +/- 119 (3.3%) |
| 4103 | +/- 169 (4.1%) |
